# Supplementary material for: Eight-Legged Encounters—Arachnids, Volunteers, and Art help to Bridge the Gap between Informal and Formal Science Learning
Source: MDPI journal article supplement (doi:10.3390/insects9010027), 2018-02-26
Supplement: s1 [file s1]

**Eight-Legged Encounters Child Survey**  
**(Denver Museum of Science and Nature)**

We would like to learn more about your experiences at this event today. Please take some time to let us know your thoughts.

| How much did you like the... | A lot                 | A little              | Not much or<br>not at all | Not<br>Interesting    |
|------------------------------|-----------------------|-----------------------|---------------------------|-----------------------|
| 1. Create a chelicerate      | <input type="radio"/> | <input type="radio"/> | <input type="radio"/>     | <input type="radio"/> |
| 2. Tissue paper flower       | <input type="radio"/> | <input type="radio"/> | <input type="radio"/>     | <input type="radio"/> |
| 3. Assemble an arachnid      | <input type="radio"/> | <input type="radio"/> | <input type="radio"/>     | <input type="radio"/> |
| 4. Path of predators booklet | <input type="radio"/> | <input type="radio"/> | <input type="radio"/>     | <input type="radio"/> |

5. Do you want to learn more about spiders?

- ☐ Yes  
☐ No

6. Do you want to learn more about science?

- ☐ Yes  
☐ No

7. When you grow up, do you want a job in science?

- ☐ Yes  
☐ No

8. How old are you?

9. (INTERVIEWER MAKE NOTE OF THIS) What is your gender?

- ☐ Male  
☐ Female

Any other comments
