# Supplementary material for: Eight-Legged Encounters—Arachnids, Volunteers, and Art help to Bridge the Gap between Informal and Formal Science Learning
Source: MDPI journal article supplement (doi:10.3390/insects9010027), 2018-02-26
Supplement: s1 [file s1]

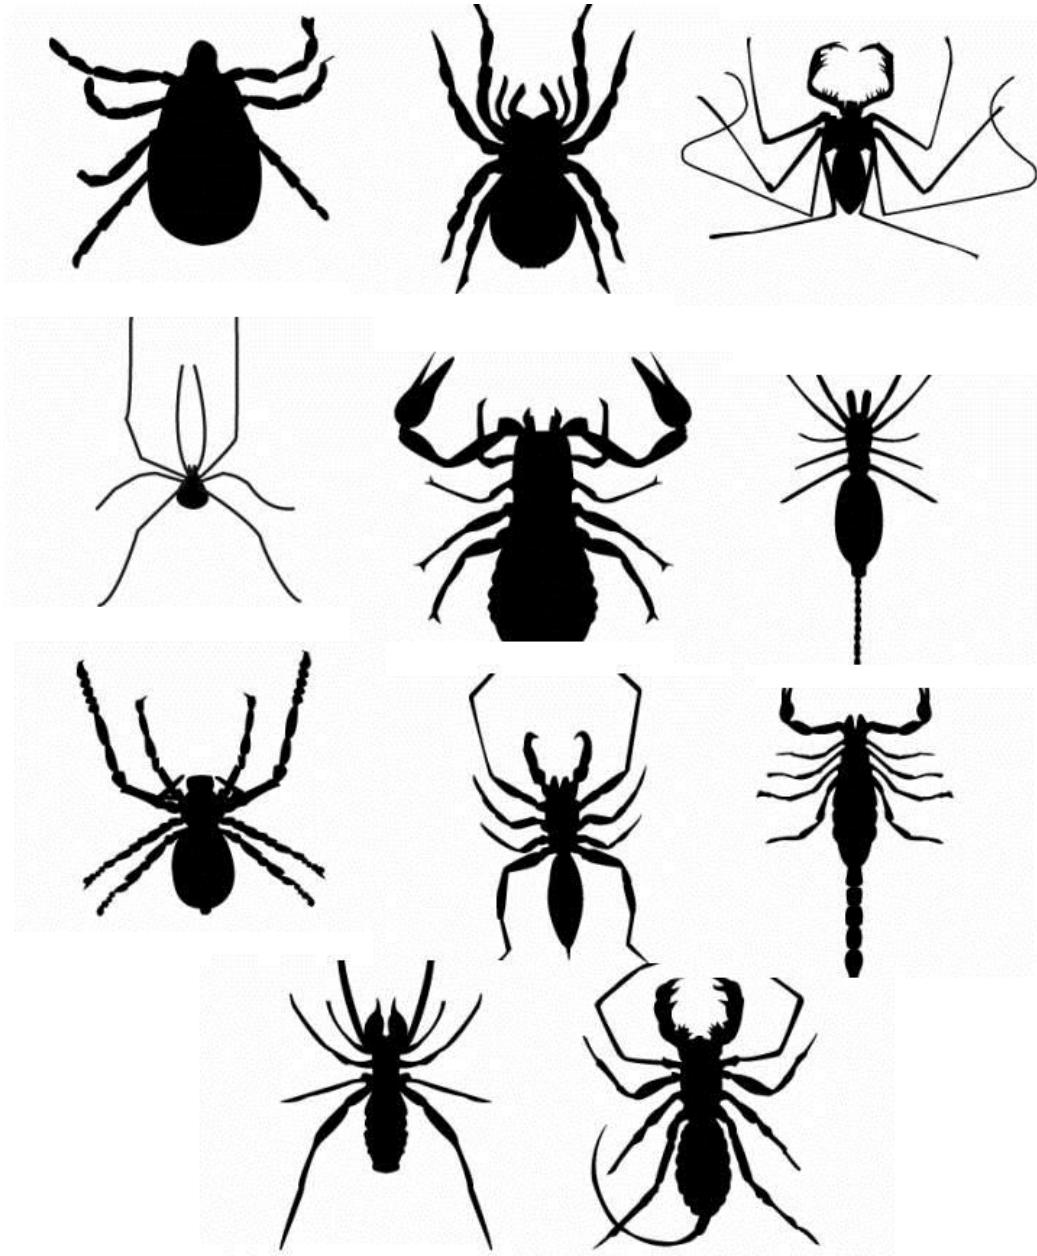

**Supplemental Figure 1.** Original stamps were used to stamp the *Path of Predators* booklet once participants completed the activities associated with each station. Top Row: Acari, Araneae, Amblypygi; 2<sup>nd</sup> Row: Opiliones, Pseudoscorpiones, Palpigradi; 3<sup>rd</sup> Row: Ricinulei, Schizomida, Scorpiones; Bottom Row: Solifugae, Thelyphonida.
