# Supplementary material for: Eight-Legged Encounters—Arachnids, Volunteers, and Art help to Bridge the Gap between Informal and Formal Science Learning
Source: MDPI journal article supplement (doi:10.3390/insects9010027), 2018-02-26
Supplement: s1 [file s1]

Morrill Hall 2014

## YOUTH SURVEY

| How much did you like the...          | A lot                 | A little              | Not much or<br>not at all | Did Not Visit         |
|---------------------------------------|-----------------------|-----------------------|---------------------------|-----------------------|
| 1. Create a chelicerate               | <input type="radio"/> | <input type="radio"/> | <input type="radio"/>     | <input type="radio"/> |
| 2. Build a burrow                     | <input type="radio"/> | <input type="radio"/> | <input type="radio"/>     | <input type="radio"/> |
| 3. Sticky vs. wooly silk              | <input type="radio"/> | <input type="radio"/> | <input type="radio"/>     | <input type="radio"/> |
| 4. Weave a web                        | <input type="radio"/> | <input type="radio"/> | <input type="radio"/>     | <input type="radio"/> |
| 5. Microscope madness                 | <input type="radio"/> | <input type="radio"/> | <input type="radio"/>     | <input type="radio"/> |
| 6. Path of predators activity booklet | <input type="radio"/> | <input type="radio"/> | <input type="radio"/>     | <input type="radio"/> |
| 7. Community Experiment               | <input type="radio"/> | <input type="radio"/> | <input type="radio"/>     | <input type="radio"/> |

Do you want to learn more about spiders?

- ☐ Yes  
☐ No

Do you want to learn more about science?

- ☐ Yes  
☐ No

Do you want to do your own research at home?

- ☐ Yes  
☐ No

When you grow up, do you want a job in science?

- ☐ Yes  
☐ No

How old are you?

(INTERVIEWER MAKE NOTE OF THIS) What is your gender?

- ☐ Male  
☐ Female
