# Supplementary material for: Eight-Legged Encounters—Arachnids, Volunteers, and Art help to Bridge the Gap between Informal and Formal Science Learning
Source: MDPI journal article supplement (doi:10.3390/insects9010027), 2018-02-26
Supplement: s1 [file s1]

## EIGHT-LEGGED ENCOUNTERS (TOLEDO ZOO)

We would like to learn more about your experiences at this event today. Please take some time to let us know your thoughts.

| How interesting did you (and your family) find the following stations? | Very Interesting | Somewhat Interesting | A Little Interesting | Not Interesting | Did Not Visit |
|------------------------------------------------------------------------|------------------|----------------------|----------------------|-----------------|---------------|
|------------------------------------------------------------------------|------------------|----------------------|----------------------|-----------------|---------------|

1. Create a chelicerate (clay)

☐☐☐☐☐

2. Path of predators activity booklet

☐☐☐☐☐

3. After participating in this activity, how much more or less likely are you to kill a spider in your house?

- ☐ Much less likely
- ☐ A little less likely
- ☐ The same
- ☐ A little more likely
- ☐ Much more likely

4. After participating in this activity, how much more or less likely are you to take the time to observe a spider, or other arachnid?

- ☐ Much less likely
- ☐ A little less likely
- ☐ The same
- ☐ A little more likely
- ☐ Much more likely

5. After participating in this activity, how much more or less likely are you to read about arachnids?

- ☐ Much less likely
- ☐ A little less likely
- ☐ The same
- ☐ A little more likely
- ☐ Much more likely

6. After participating in this event, if you are a student, did this make you more or less likely to consider a future job in science?

- ☐ Much less likely
- ☐ A little less likely
- ☐ The same
- ☐ A little more likely
- ☐ Much more likely
- ☐ Not Applicable

7. How much more or less interested are you in learning about scientific discoveries?

- ☐ Much less interested
- ☐ A little less interested
- ☐ The same
- ☐ A little more interested
- ☐ Much more interested

8. How effective was the artwork in engaging you with the exhibit?

- ☐ Not at all effective
- ☐ A little effective
- ☐ Somewhat effective
- ☐ Very effective

9. How effective were the volunteers in engaging you with the exhibit?

- ☐ Not at all effective
- ☐ A little effective
- ☐ Somewhat effective
- ☐ Very effective

How could the volunteers be more effective in engaging you with the exhibit?

**Did you learn anything new? If so, please briefly describe.**

A large, empty rounded rectangular box with a thin black border, intended for a user to describe what they have learned.

**Do you think it is important for these kinds of activities to be available to the public? If so, why?**

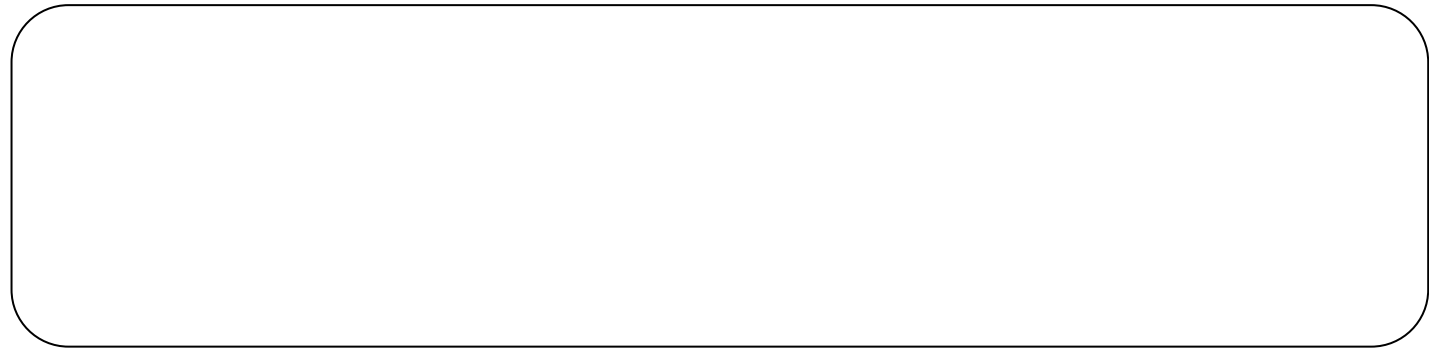A large, empty rounded rectangular box with a thin black border, intended for a user to discuss the importance of the activities.

**Please use the space below to provide any additional comments or feedback:**

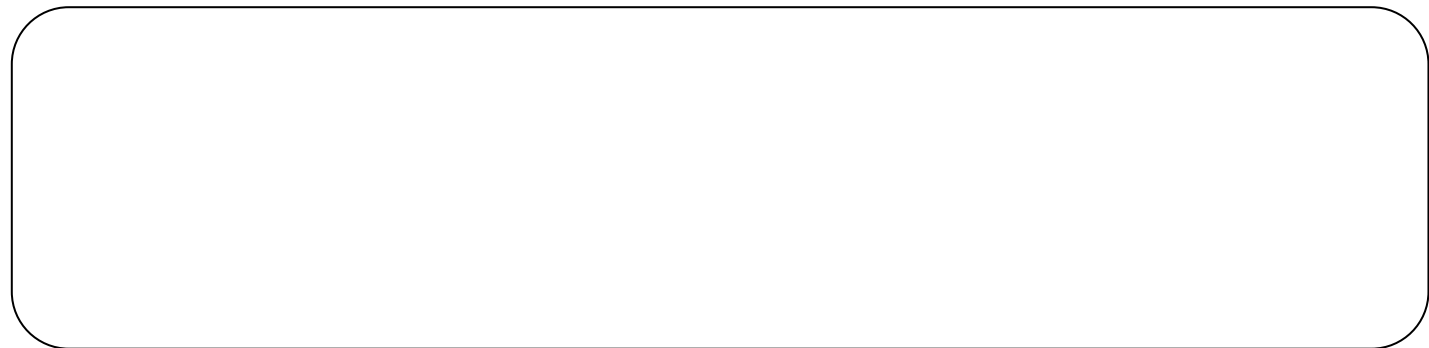A large, empty rounded rectangular box with a thin black border, intended for a user to provide additional comments or feedback.

**Thank you!**
