# Supplementary material for: Eight-Legged Encounters—Arachnids, Volunteers, and Art help to Bridge the Gap between Informal and Formal Science Learning
Source: MDPI journal article supplement (doi:10.3390/insects9010027), 2018-02-26
Supplement: s1 [file s1]

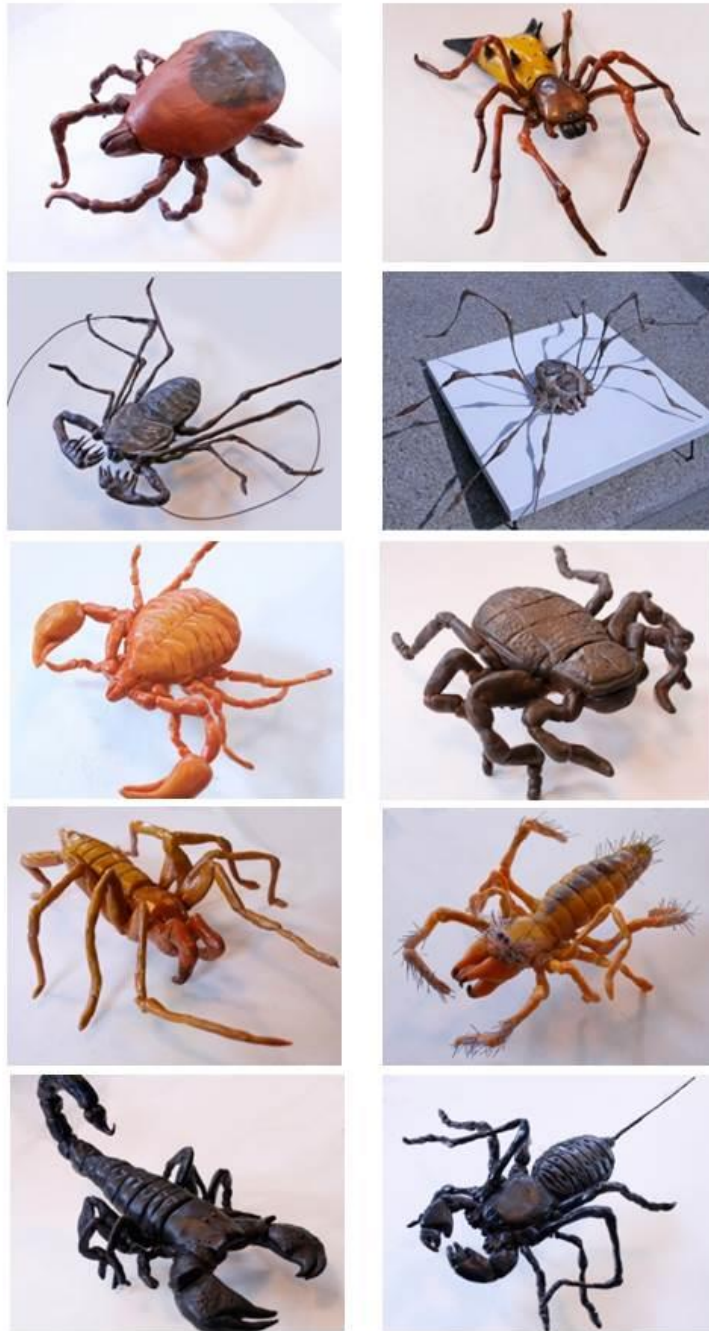

**Supplemental Figure 2.** Clay sculptures brought to life the diverse arachnids that are the focus of the *Path of Predators*. Top Row: Acari, Araneae; 2<sup>nd</sup> Row: Amblypygi, Opiliones; 3<sup>rd</sup> Row: Pseudoscorpiones, Ricinulei; 4<sup>th</sup> Row: Schizomida, Solifugae; 5<sup>th</sup> Row: Scorpiones, Thelyphonida.
