# Supplementary material for: Eight-Legged Encounters—Arachnids, Volunteers, and Art help to Bridge the Gap between Informal and Formal Science Learning
Source: MDPI journal article supplement (doi:10.3390/insects9010027), 2018-02-26
Supplement: s1 [file s1]

## Eight-Legged Encounters Experience Survey

We would like to learn about your experiences at this event today. All of your responses are anonymous.

### 1. How interesting did you (and your family) find the following stations:

|                                      | Very<br>Interesting   | Interesting           | Somewhat<br>Interesting | Not<br>Interesting    | Does Not<br>Apply/Did<br>Not Visit |
|--------------------------------------|-----------------------|-----------------------|-------------------------|-----------------------|------------------------------------|
| a. Myth Busters                      | <input type="radio"/> | <input type="radio"/> | <input type="radio"/>   | <input type="radio"/> | <input type="radio"/>              |
| b. Path of Predators                 | <input type="radio"/> | <input type="radio"/> | <input type="radio"/>   | <input type="radio"/> | <input type="radio"/>              |
| c. Assemble an Arachnid              | <input type="radio"/> | <input type="radio"/> | <input type="radio"/>   | <input type="radio"/> | <input type="radio"/>              |
| d. Create a Chelicerate              | <input type="radio"/> | <input type="radio"/> | <input type="radio"/>   | <input type="radio"/> | <input type="radio"/>              |
| e. Tissue Paper Flower & Crab Spider | <input type="radio"/> | <input type="radio"/> | <input type="radio"/>   | <input type="radio"/> | <input type="radio"/>              |
| f. Weave a Web                       | <input type="radio"/> | <input type="radio"/> | <input type="radio"/>   | <input type="radio"/> | <input type="radio"/>              |
| g. Microscope Madness                | <input type="radio"/> | <input type="radio"/> | <input type="radio"/>   | <input type="radio"/> | <input type="radio"/>              |
| h. Shining for Spiders               | <input type="radio"/> | <input type="radio"/> | <input type="radio"/>   | <input type="radio"/> | <input type="radio"/>              |
| i. Foraging Experiment               | <input type="radio"/> | <input type="radio"/> | <input type="radio"/>   | <input type="radio"/> | <input type="radio"/>              |

### 2. How did you learn about the event?

- ☐ Newspaper
- ☐ Radio
- ☐ School
- ☐ Museum Website
- ☐ Friends of the Museum
- ☐ Facebook
- ☐ UNL email
- ☐ TV
- ☐ Attended other *Sunday with a Scientist*
- ☐ Other:
- ☐ Did not know it was going on

### 3. In what city and state do you live?

### 4. How interested are you (and your family) in learning more about science after this event?

- ☐ Very Interested
- ☐ Interested
- ☐ Somewhat Interested
- ☐ Not at all Interested

### 5. (My family) and I learned a lot about science at this event.

- ☐ Strongly Agree
- ☐ Agree
- ☐ Disagree
- ☐ Strongly Disagree

### 6. Please list suggestions for additional topics that may be of interest to you.

### 7. What did you like about this event?

Thank you for your time!
