# Supplementary material for: Eight-Legged Encounters—Arachnids, Volunteers, and Art help to Bridge the Gap between Informal and Formal Science Learning
Source: Insects. 2018 Feb 26;9(1):27. doi: 10.3390/insects9010027 (PMC5872292; doi:10.3390/insects9010027)
Supplement: Supplementary file 1 [file insects-09-00027-s001.zip]

Archive with 12 entries (12 files):
- Eileen Hebets/Survey g.pdf
- Eileen Hebets/Mini Path of Predators.pdf
- Eileen Hebets/Path of Predators Activity Booklet.pdf
- Eileen Hebets/Supplemental Figure 1.pdf
- Eileen Hebets/Supplemental Figure 2.pdf
- Eileen Hebets/Survey a.pdf
- Eileen Hebets/Survey b.pdf
- Eileen Hebets/Survey c.pdf
- Eileen Hebets/Survey d.pdf
- Eileen Hebets/Survey e.pdf
- Eileen Hebets/Survey f.pdf
- Eileen Hebets/Volunteer Survey.pdf
